# Supplementary material for: Differential requirement for satellite cells during overload-induced muscle hypertrophy in growing versus mature mice
Source: PubMed Central journal article supplement (PMC5504676; doi:10.1186/s13395-017-0132-z), 2017-07-10

**Dystrophin DAPI BrdU**  
**14 day OV**

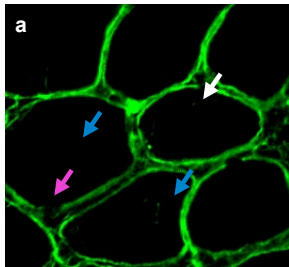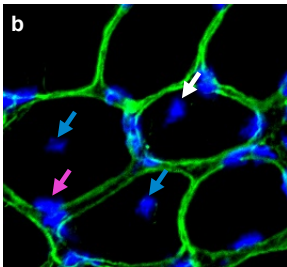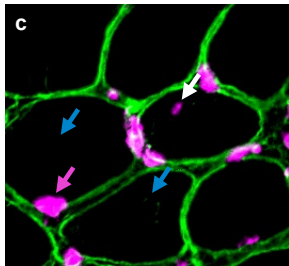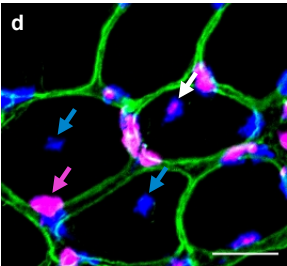

Supplement: 13395_2017_132_MOESM1_ESM.pdf [file 13395_2017_132_MOESM1_ESM.pdf]
